# Supplementary material for: Mammalian enamel maturation: Crystallographic changes prior to tooth eruption
Source: PubMed Central journal article supplement (PMC5308864; doi:10.1371/journal.pone.0171424), 2017-02-14
Supplement: pone.0171424.s001.pdf [file pone.0171424.s001.pdf]

Table S1: Examined individuals. EdEc = expected duration of enamel calcification.

| <b>no.</b> | <b>age (month)</b> | <b>age (days)</b> | <b>EdEc (days)</b> |
|------------|--------------------|-------------------|--------------------|
| L14        | 16                 | 490               | 250                |
| K373       | 17                 | 516               | 276                |
| K291       | 18                 | 553               | 313                |
| K301       | 19                 | 573               | 333                |
| K260       | 20                 | 616               | 376                |
| K115       | 23                 | 689               | 449                |
| K283       | 24                 | 731               | 491                |
| K261       | 24                 | 735               | 495                |
| K257       | 24                 | 738               | 498                |
| K258       | 24                 | 738               | 498                |
| K41        | 25                 | 747               | 507                |
| K31        | 25                 | 747               | 507                |
| K105       | 26                 | 781               | 541                |
| K106       | 26                 | 781               | 541                |
| K113       | 28                 | 857               | 617                |
| G269       | 30                 | 902               | 662                |
