# Supplementary material for: Mammalian enamel maturation: Crystallographic changes prior to tooth eruption
Source: PubMed Central journal article supplement (PMC5308864; doi:10.1371/journal.pone.0171424), 2017-02-14
Supplement: pone.0171424.s003.pdf [file pone.0171424.s003.pdf]

Table S3: Mean values and sigma statistics of particular variables under study.

| age | n | size     |       |      |       |          |       |      |       | strain   |       |      |       |             |       |      |       |
|-----|---|----------|-------|------|-------|----------|-------|------|-------|----------|-------|------|-------|-------------|-------|------|-------|
|     |   | IN       | sigma | OUT  | sigma | ME       | sigma | DI   | sigma | IN       | sigma | OUT  | sigma | ME          | sigma | DI   | sigma |
| 16  | 1 | 23.5     | 0.2   | 19.0 | 0.2   | 21.8     | 0.2   | 16.5 | 0.3   | 14.3     | 0.5   | 15.7 | 0.5   | 13.5        | 0.4   | 25.5 | 0.8   |
| 17  | 2 | 25.9     | 0.2   | 22.4 | 0.2   | 27.3     | 0.2   | 16.4 | 0.2   | 13.9     | 0.5   | 15.3 | 0.5   | 11.2        | 0.4   | 24.9 | 0.5   |
| 18  | 2 | 29.3     | 0.4   | 27.1 | 0.3   | 32.3     | 0.3   | 19.0 | 0.2   | 15.5     | 0.4   | 17.6 | 0.6   | 12.2        | 0.6   | 17.2 | 0.6   |
| 19  | 1 | 33.0     | 0.5   | 32.0 | 0.3   | 35.0     | 0.3   | 19.3 | 0.2   | 15.5     | 0.6   | 16.4 | 0.5   | 12.4        | 0.5   | 16.7 | 0.6   |
| 20  | 2 | 36.1     | 0.4   | 32.8 | 0.2   | 34.8     | 0.3   | 24.9 | 0.2   | 12.2     | 0.4   | 13.9 | 0.8   | 11.9        | 0.5   | 10.2 | 0.5   |
| 23  | 1 | -        | -     | -    | -     | 36.9     | 0.3   | 33.0 | 0.3   | -        | -     | -    | -     | 12.4        | 0.3   | 13.0 | 0.4   |
| 24  | 4 | -        | -     | -    | -     | 35.2     | 0.3   | 33.5 | 0.3   | -        | -     | -    | -     | 12.3        | 0.5   | 11.4 | 0.4   |
| 25  | 2 | -        | -     | -    | -     | 37.9     | 0.3   | 31.2 | 0.3   | -        | -     | -    | -     | 12.4        | 0.4   | 13.5 | 0.4   |
| 26  | 1 | 38.2     | 0.2   | 37.0 | 0.3   | 36.2     | 0.3   | 36.2 | 0.4   | 12.1     | 0.3   | 11.4 | 0.4   | 12.1        | 0.4   | 12.6 | 0.4   |
| 28  | 1 | -        | -     | -    | -     | 36.9     | 0.3   | 35.8 | 0.3   | -        | -     | -    | -     | 12.3        | 0.4   | 12.5 | 0.3   |
| 30  | 1 | -        | -     | -    | -     | 38.9     | 0.6   | 36.1 | 0.3   | -        | -     | -    | -     | 15.7        | 1.0   | 12.8 | 0.4   |
| age | n | $H_{IT}$ |       |      |       | $E_{IT}$ |       |      |       | $C_{IT}$ |       |      |       | $\eta_{IT}$ |       |      |       |
|     |   | IN       | sigma | OUT  | sigma | IN       | sigma | OUT  | sigma | IN       | sigma | OUT  | sigma | IN          | sigma | OUT  | sigma |
| 16  | 1 | 0.02     | 0.01  | 0.2  | 0.1   | 1.6      | 0.5   | 4.4  | 1.7   | 22.8     | 4.9   | 22.0 | 7.4   | 9.4         | 1.4   | 18.4 | 5     |
| 17  | 2 | 0.03     | 0.01  | 0.1  | 0.01  | 1.9      | 0.3   | 0.8  | 0.1   | 20.6     | 2.8   | 22.6 | 2.7   | 8.9         | 1.6   | 7.8  | 0.6   |
| 18  | 2 | 0.3      | 0.05  | 0.09 | 0.01  | 11.3     | 2.0   | 3.4  | 0.4   | 5.4      | 1.5   | -    | -     | 17.2        | 1.5   | 18.0 | 0.8   |
| 19  | 1 | 0.4      | 0.03  | 0.2  | 0.03  | 16.3     | 1.1   | 6.1  | 0.7   | 8.2      | 0.3   | 8.4  | 0.3   | 18.7        | 0.5   | 17.8 | 0.4   |
| 20  | 2 | 2.3      | 0.3   | 0.6  | 0.2   | 58.6     | 4.9   | 20.1 | 3.9   | 6.4      | 0.4   | 7.5  | 0.7   | 23.6        | 1.2   | 19.0 | 1.3   |
| 23  | 1 | 3.9      | 0.2   | 3.9  | 0.4   | 76.7     | 3.2   | 77.4 | 3.9   | 5.4      | 0.4   | 5.2  | 0.7   | 29.2        | 0.7   | 30.0 | 1.2   |
| 24  | 4 | 3.3      | 0.2   | 4.5  | 0.2   | 70.5     | 3.4   | 81.6 | 3.9   | 5.8      | 0.5   | 5.3  | 0.5   | 27.1        | 0.7   | 30.9 | 0.7   |
| 25  | 2 | 4.0      | 0.2   | 4.6  | 0.2   | 78.5     | 4.7   | 84.4 | 3.8   | 5.6      | 0.4   | 5.2  | 0.6   | 29.3        | 0.3   | 31.6 | 1.0   |
| 26  | 1 | 3.8      | 0.2   | 4.7  | 0.2   | 77.5     | 1.9   | 86.8 | 4.8   | 5.5      | 0.7   | 5.3  | 1.3   | 28.2        | 0.8   | 30.6 | 1.2   |
| 28  | 1 | 3.7      | 0.2   | 4.6  | 0.1   | 76.32    | 2.7   | 78.8 | 2.4   | 5.5      | 0.4   | 5.0  | 0.3   | 28.9        | 0.7   | 32.0 | 0.6   |
| 30  | 1 | 3.8      | 0.2   | 4.4  | 1.6   | 73.2     | 4.4   | 75.6 | 2.0   | 5.5      | 0.4   | 5.3  | 0.3   | 29.0        | 0.4   | 32.3 | 0.9   |
