# Supplementary material for: Mammalian enamel maturation: Crystallographic changes prior to tooth eruption
Source: PubMed Central journal article supplement (PMC5308864; doi:10.1371/journal.pone.0171424), 2017-02-14
Supplement: pone.0171424.s004.pdf [file pone.0171424.s004.pdf]

Table S4: Coefficients of Wilcoxon statistics with age as categorial variable.

|            |                       |     | <b>n</b> | <b>T</b> | <b>Z</b> | <b>p-value</b> |
|------------|-----------------------|-----|----------|----------|----------|----------------|
| <b>age</b> | <b>size</b>           | IN  | 6        | 0.00     | 2.20     | 0.03           |
|            |                       | OUT | 6        | 0.00     | 2.20     | 0.03           |
|            |                       | ME  | 11       | 0.00     | 2.93     | <b>0.003</b>   |
|            |                       | DI  | 11       | 0.00     | 2.93     | <b>0.003</b>   |
|            | <b>strain</b>         | IN  | 6        | 0.00     | 2.20     | 0.03           |
|            |                       | OUT | 6        | 0.00     | 2.20     | 0.03           |
|            |                       | ME  | 11       | 0.00     | 2.93     | <b>0.003</b>   |
|            |                       | DI  | 11       | 7.00     | 2.31     | <b>0.002</b>   |
|            | <b>H<sub>IT</sub></b> | IN  | 11       | 0.00     | 2.93     | <b>0.003</b>   |
|            |                       | OUT | 11       | 1.00     | 2.85     | <b>0.004</b>   |
|            | <b>E<sub>IT</sub></b> | IN  | 11       | 10.00    | 2.05     | 0.04           |
|            |                       | OUT | 11       | 14.00    | 1.69     | 0.09           |
|            | <b>C<sub>IT</sub></b> | IN  | 11       | 3.00     | 2.67     | <b>0.007</b>   |
|            |                       | OUT | 10       | 3.00     | 2.49     | <b>0.01</b>    |
|            | <b>η<sub>IT</sub></b> | IN  | 11       | 31.00    | 0.17     | 0.86           |
|            |                       | OUT | 11       | 17.00    | 1.42     | 0.16           |
