# Supplementary material for: Mammalian enamel maturation: Crystallographic changes prior to tooth eruption
Source: PubMed Central journal article supplement (PMC5308864; doi:10.1371/journal.pone.0171424), 2017-02-14
Supplement: pone.0171424.s005.pdf [file pone.0171424.s005.pdf]

Table S5: Spearman correlation coefficients among particular variables.

|             |     | age           | size          |               |               |               | strain       |              |        |               | $H_{IT}$      |               | $E_{IT}$      |               | $C_{IT}$     |               | $\eta_{IT}$   |               |
|-------------|-----|---------------|---------------|---------------|---------------|---------------|--------------|--------------|--------|---------------|---------------|---------------|---------------|---------------|--------------|---------------|---------------|---------------|
|             |     |               | IN            | OUT           | ME            | DI            | IN           | OUT          | ME     | DI            | IN            | OUT           | IN            | OUT           | IN           | OUT           | IN            | OUT           |
| age         |     | 1.000         | 1.000         | 1.000         | <b>0.891</b>  | <b>0.936</b>  | -0.486       | -0.542       | 0.264  | <b>-0.673</b> | <b>0.800</b>  | <b>0.845</b>  | <b>0.818</b>  | <b>0.782</b>  | -0.533       | <b>-0.770</b> | <b>0.809</b>  | <b>0.909</b>  |
| size        | IN  | 1.000         | 1.000         | 1.000         | <b>0.943</b>  | <b>0.943</b>  | -0.486       | -0.543       | -0.314 | <b>-0.943</b> | 1.000         | 0.657         | 1.000         | <b>0.829</b>  | -0.657       | <b>-0.900</b> | <b>0.943</b>  | 0.600         |
|             | OUT | 1.000         | 1.000         | 1.000         | <b>0.943</b>  | <b>0.943</b>  | -0.486       | -0.543       | -0.314 | <b>-0.943</b> | 1.000         | 0.657         | 1.000         | <b>0.829</b>  | -0.657       | <b>-0.900</b> | <b>0.943</b>  | 0.600         |
|             | ME  | <b>0.891</b>  | <b>0.943</b>  | <b>0.943</b>  | 1.000         | <b>0.791</b>  | -0.257       | -0.371       | 0.481  | -0.464        | <b>0.918</b>  | <b>0.700</b>  | <b>0.873</b>  | <b>0.718</b>  | -0.579       | <b>-0.842</b> | <b>0.945</b>  | <b>0.827</b>  |
| strain      | DI  | <b>0.936</b>  | <b>0.943</b>  | <b>0.943</b>  | <b>0.791</b>  | 1.000         | -0.429       | -0.486       | 0.200  | <b>-0.718</b> | <b>0.764</b>  | <b>0.882</b>  | <b>0.791</b>  | <b>0.836</b>  | -0.524       | <b>-0.685</b> | <b>0.764</b>  | <b>0.836</b>  |
|             | IN  | -0.486        | -0.486        | -0.486        | -0.257        | -0.429        | 1.000        | <b>0.943</b> | 0.600  | 0.429         | -0.486        | -0.600        | -0.486        | -0.486        | 0.143        | 0.600         | -0.429        | -0.657        |
|             | OUT | -0.543        | -0.543        | -0.543        | -0.371        | -0.486        | <b>0.943</b> | 1.000        | 0.543  | 0.486         | -0.543        | -0.657        | -0.543        | -0.600        | -0.029       | 0.600         | -0.486        | -0.600        |
|             | ME  | 0.264         | -0.3314       | -0.314        | 0.482         | 0.200         | 0.600        | 0.543        | 1.000  | 0.218         | 0.291         | 0.291         | 0.200         | 0.173         | -0.123       | -0.345        | 0.445         | 0.473         |
| $H_{IT}$    | DI  | <b>-0.673</b> | <b>-0.943</b> | <b>-0.943</b> | -0.464        | <b>-0.718</b> | 0.429        | 0.486        | 0.218  | 1.000         | -0.500        | <b>-0.645</b> | -0.536        | <b>-0.636</b> | 0.273        | 0.467         | -0.482        | -0.600        |
|             | IN  | <b>0.800</b>  | 1.000         | 1.000         | <b>0.918</b>  | <b>0.764</b>  | -0.486       | -0.543       | 0.291  | -0.500        | 1.000         | <b>0.773</b>  | <b>0.982</b>  | <b>0.845</b>  | -0.551       | <b>-0.806</b> | <b>0.982</b>  | <b>0.727</b>  |
| $E_{IT}$    | OUT | <b>0.845</b>  | 0.657         | 0.657         | <b>0.700</b>  | <b>0.882</b>  | -0.600       | -0.657       | 0.209  | <b>-0.645</b> | <b>0.773</b>  | 1.000         | <b>0.845</b>  | <b>0.955</b>  | -0.333       | <b>-0.721</b> | <b>0.764</b>  | <b>0.845</b>  |
|             | IN  | <b>0.818</b>  | 1.000         | 1.000         | <b>0.873</b>  | <b>0.791</b>  | -0.486       | -0.543       | 0.200  | -0.536        | <b>0.982</b>  | <b>0.845</b>  | 1.000         | <b>0.900</b>  | 0.900        | -0.524        | <b>-0.794</b> | <b>0.945</b>  |
| $C_{IT}$    | OUT | <b>0.782</b>  | <b>0.829</b>  | <b>0.829</b>  | <b>0.718</b>  | <b>0.836</b>  | -0.486       | -0.600       | 0.173  | <b>-0.636</b> | <b>0.845</b>  | <b>0.954</b>  | <b>0.900</b>  | 1.000         | -0.309       | <b>-0.685</b> | <b>0.818</b>  | <b>0.755</b>  |
|             | IN  | -0.533        | -0.657        | -0.657        | -0.579        | -0.524        | 0.143        | -0.029       | -0.123 | 0.273         | -0.551        | -0.333        | -0.524        | -0.310        | 1.000        | <b>8.999</b>  | -0.556        | -0.460        |
| $\eta_{IT}$ | OUT | <b>-0.770</b> | <b>-0.900</b> | <b>-0.900</b> | <b>-0.842</b> | <b>-0.685</b> | 0.600        | 0.600        | -0.345 | 0.467         | <b>-0.806</b> | <b>-0.721</b> | <b>-0.794</b> | <b>-0.685</b> | <b>0.899</b> | 1.000         | <b>-0.842</b> | <b>-0.818</b> |
|             | IN  | <b>0.809</b>  | <b>0.943</b>  | <b>0.943</b>  | <b>0.945</b>  | <b>0.764</b>  | -0.429       | -0.486       | 0.445  | -0.481        | <b>0.982</b>  | <b>0.764</b>  | <b>0.945</b>  | <b>0.818</b>  | -0.556       | <b>-0.842</b> | 1.000         | <b>0.791</b>  |
|             | OUT | <b>0.909</b>  | 0.600         | 0.600         | <b>0.827</b>  | <b>0.836</b>  | -0.657       | -0.600       | 0.473  | -0.600        | <b>0.727</b>  | <b>0.845</b>  | <b>0.727</b>  | <b>0.755</b>  | -0.460       | <b>-0.818</b> | <b>0.791</b>  | 1.000         |
